# Supplementary material for: Loss of Function of the Neural Cell Adhesion Molecule NrCAM Regulates Differentiation, Proliferation and Neurogenesis in Early Postnatal Hypothalamic Tanycytes
Source: Front Neurosci. 2022 Apr 7;16:832961. doi: 10.3389/fnins.2022.832961 (PMC9022636; doi:10.3389/fnins.2022.832961)
Supplement: Supplementary Table 2 — Differential gene expression as measured by scRNA-Seq in astrocytes across genotype. [file Table_2.csv]

gene	average_log_Fold_Change (positive = higher in Control, negative = higher in NrCAM KO)	percentage of cells expressing gene (Control)	percentage of cells expressing gene (NrCAM KO)	p_val_adj
Agt	0.667138464	0.954	0.908	4.12E-54
Gm3764	0.61190171	0.735	0.315	1.30E-45
Itih3	0.599929992	0.941	0.842	1.57E-44
Ntsr2	0.554000395	0.954	0.861	2.30E-52
Gpr37l1	0.520537975	0.954	0.838	7.73E-47
Apoe	0.50070775	1	1	2.22E-61
Pla2g7	0.485650909	0.871	0.704	1.04E-27
Htra1	0.482116248	0.725	0.406	2.70E-32
Slc7a10	0.476830144	0.695	0.368	8.20E-31
S1pr1	0.457380275	0.751	0.452	2.78E-30
Cldn10	0.452205632	0.785	0.454	5.64E-31
Gpld1	0.448762276	0.715	0.376	1.02E-31
Slc6a11	0.436640771	0.979	0.931	5.10E-36
Slc6a1	0.436231664	0.811	0.585	5.46E-26
Mt2	0.428598483	0.79	0.502	7.05E-27
F3	0.428510201	0.695	0.443	6.05E-22
Mfge8	0.426993432	0.72	0.435	4.42E-26
Cst3	0.424820928	1	1	2.39E-35
Fgfr3	0.423440796	0.691	0.39	2.36E-25
Bcan	0.42300806	0.868	0.671	1.06E-27
Atp1b2	0.415227025	0.963	0.914	2.60E-30
Mt1	0.413029054	0.998	0.995	1.21E-38
Xist	0.410984073	0.735	0.474	6.62E-21
Adcyap1r1	0.403145424	0.57	0.284	1.21E-23
Slc1a3	0.401819583	0.979	0.953	2.53E-32
5031439G07Rik	0.398611175	0.477	0.209	6.59E-24
Gja1	0.398502779	0.936	0.899	4.87E-27
Mmd2	0.386706108	0.827	0.576	1.35E-25
Slc27a1	0.380062475	0.552	0.279	1.24E-23
Slc39a12	0.378692433	0.599	0.292	3.36E-26
Psap	0.377815754	0.922	0.8	1.87E-25
Clu	0.373026084	0.984	0.964	4.97E-28
2310022B05Rik	0.37024744	0.723	0.438	6.20E-23
Srebf1	0.362530469	0.521	0.254	3.66E-23
Adgrg1	0.358729637	0.555	0.298	4.84E-21
Sfrp5	0.355783492	0.43	0.154	2.90E-25
Cd81	0.353633872	0.995	0.994	7.57E-33
Slc6a9	0.347303625	0.607	0.315	1.54E-22
Paqr7	0.346034187	0.489	0.212	9.27E-24
Ttyh1	0.345666406	0.971	0.911	1.61E-28
Acsl6	0.343961828	0.705	0.415	7.89E-22
Ttyh3	0.342016156	0.498	0.217	4.48E-24
Gjb6	0.339541512	0.682	0.413	6.89E-19
Aldoc	0.338927724	0.974	0.958	1.91E-22
Slc7a11	0.338073439	0.647	0.382	4.24E-18
Nrcam	0.334985551	0.526	0.237	2.06E-24
Entpd2	0.334914508	0.409	0.161	3.11E-22
Slc25a18	0.331632772	0.578	0.317	3.62E-20
Lfng	0.331298504	0.458	0.183	1.99E-24
Mdk	0.32905488	0.557	0.3	4.12E-19
Ednrb	0.327890942	0.767	0.527	1.03E-17
Rgma	0.327480755	0.554	0.264	1.38E-23
Enho	0.326555859	0.596	0.326	2.27E-20
Nkx6-2	0.322031193	0.406	0.22	4.49E-13
Sparcl1	0.319149559	0.998	0.994	5.32E-32
Ckb	0.317845944	0.997	0.984	5.39E-25
Camk2g	0.312786611	0.554	0.289	2.44E-20
Acsl3	0.307213757	0.871	0.743	5.10E-16
Ndrg2	0.306028375	0.972	0.945	1.57E-22
Fam20a	0.304336556	0.344	0.14	1.02E-17
Acsbg1	0.303873746	0.568	0.342	1.62E-15
Grk3	0.302706768	0.432	0.197	9.24E-19
Atp1a2	0.302053857	0.998	0.994	4.76E-26
Lrrc8a	0.294255346	0.634	0.363	8.31E-19
Tril	0.292029524	0.591	0.351	8.17E-15
Grina	0.289445269	0.573	0.337	1.15E-16
Selenop	0.289395238	0.829	0.719	3.64E-13
Paqr6	0.280898855	0.498	0.253	6.57E-17
Adgrb1	0.280475385	0.484	0.256	1.09E-15
Hepacam	0.280155729	0.671	0.406	2.70E-17
Tlcd1	0.278964038	0.445	0.207	2.59E-17
Prnp	0.278940332	0.891	0.824	6.62E-13
Nkain4	0.278873563	0.71	0.477	3.82E-13
Ldhb	0.276703809	0.708	0.47	8.00E-14
Igsf1	0.276364925	0.534	0.34	7.48E-12
Atp13a4	0.275886894	0.391	0.156	7.80E-20
Phgdh	0.27516174	0.471	0.246	9.16E-17
Agpat5	0.274622887	0.557	0.303	1.45E-16
Slc3a2	0.274460517	0.507	0.27	1.99E-16
Sorbs1	0.272244833	0.443	0.248	2.03E-12
Tmem176b	0.271207428	0.45	0.226	8.17E-16
Plpp3	0.270294143	0.987	0.969	3.43E-20
Tsc22d4	0.26617808	0.749	0.498	3.88E-17
Eno1	0.264473696	0.55	0.324	2.38E-15
Timp4	0.26172373	0.521	0.303	4.74E-14
Tecr	0.26168369	0.661	0.451	5.07E-13
Lgi1	0.261288095	0.412	0.222	2.03E-13
Slc20a2	0.260564388	0.314	0.129	1.68E-15
Id3	0.258785382	0.358	0.232	7.40E-07
Csrp1	0.254491153	0.642	0.388	1.18E-15
Hes5	0.254343622	0.322	0.14	9.04E-14
Mgst1	0.253807507	0.559	0.331	8.97E-14
Gstm1	0.253237569	0.743	0.538	2.74E-12
Cd38	0.251993445	0.388	0.173	2.57E-16
Atp6v0e	0.250511963	0.562	0.34	1.38E-13
Spon1	0.250309396	0.529	0.304	9.30E-15
Slc38a3	0.249409049	0.42	0.214	6.26E-15
Serpine2	0.248424853	0.777	0.591	4.54E-12
Scrg1	0.245848606	0.314	0.125	2.02E-15
Pik3ip1	0.244913684	0.366	0.167	2.66E-15
Paqr8	0.244737749	0.5	0.285	3.53E-13
Aqp4	0.243811607	0.686	0.476	5.86E-10
Cd63	0.243203946	0.764	0.573	2.03E-11
Ddhd1	0.241138336	0.428	0.229	1.04E-13
Fut9	0.23933083	0.568	0.346	7.32E-13
Kcnj10	0.237767078	0.627	0.44	1.51E-09
Itm2c	0.237214329	0.884	0.796	8.24E-13
Slc4a4	0.23708408	0.976	0.939	3.89E-16
Kcnip3	0.236484976	0.368	0.153	3.21E-17
Fzd2	0.235406421	0.362	0.184	2.67E-12
Fxyd1	0.23473182	0.663	0.463	1.17E-10
Malat1	0.233690197	0.992	0.998	4.26E-08
Etnppl	0.232791064	0.516	0.314	2.82E-11
Appl2	0.232319046	0.342	0.161	7.88E-14
Hnrnpa2b1	0.230661138	0.661	0.459	1.15E-12
Ubc	0.230459997	0.621	0.424	1.63E-11
Ramp1	0.229410219	0.645	0.462	6.24E-10
Trim9	0.228658235	0.409	0.212	2.47E-13
Rcn2	0.227885811	0.704	0.524	5.69E-10
Lgi4	0.227813089	0.336	0.148	2.00E-14
Adk	0.226455591	0.417	0.195	1.80E-15
Slc1a4	0.226116831	0.402	0.168	3.26E-17
Glul	0.225122058	0.899	0.852	1.81E-11
Pnpla7	0.223996466	0.252	0.084	1.75E-15
AI464131	0.221565809	0.313	0.126	7.43E-15
Sdc3	0.22148547	0.397	0.193	8.60E-14
Fasn	0.220743624	0.362	0.173	1.03E-13
Scg3	0.219139369	0.684	0.457	2.35E-12
Cyp2d22	0.218168861	0.29	0.114	1.62E-14
Lrig1	0.218168861	0.493	0.262	4.50E-14
Lrp1	0.217163172	0.604	0.399	8.02E-11
Snrnp70	0.217044017	0.492	0.317	3.58E-09
Cxcl14	0.216698023	0.596	0.359	3.75E-13
Cyp2j9	0.216633751	0.401	0.195	1.04E-13
Macf1	0.216450174	0.713	0.507	4.15E-10
Gabbr2	0.216181709	0.484	0.303	4.93E-10
Nr1d1	0.215554175	0.29	0.134	2.29E-11
Pitpnc1	0.21333671	0.653	0.429	8.36E-12
Lamp1	0.213236918	0.783	0.59	7.66E-11
Qk	0.212446904	0.842	0.708	2.88E-09
Prodh	0.212110859	0.293	0.114	7.16E-15
Tubb2b	0.212054023	0.542	0.342	3.57E-11
Msmo1	0.211984349	0.485	0.29	9.82E-11
Plxnb1	0.211435657	0.362	0.158	3.79E-15
Metrn	0.210915401	0.417	0.229	1.15E-11
Son	0.210669573	0.855	0.725	1.07E-09
Mlc1	0.209763991	0.769	0.568	8.51E-10
Kcnn2	0.209689969	0.277	0.122	7.06E-12
Cmtm5	0.209355744	0.487	0.278	3.23E-12
Cables1	0.209346016	0.34	0.144	5.09E-15
Ttyh2	0.208701651	0.384	0.192	9.30E-13
Eva1a	0.208035225	0.334	0.167	7.36E-12
Fabp5	0.207915274	0.567	0.399	9.66E-09
Hr	0.207789762	0.238	0.089	9.03E-13
Gm2a	0.207510725	0.588	0.36	2.15E-11
Ntrk2	0.207150891	0.953	0.934	2.64E-13
Slc1a2	0.206682845	0.99	0.984	1.57E-13
Clptm1	0.206292102	0.314	0.151	1.37E-11
Slc41a1	0.205616508	0.293	0.131	4.56E-12
Phyhipl	0.205082981	0.472	0.298	1.67E-09
Abhd3	0.204866274	0.479	0.273	5.30E-12
Ctsb	0.204731612	0.66	0.432	2.35E-12
Nat8f1	0.204381378	0.293	0.136	2.98E-11
Tpp1	0.202137076	0.29	0.115	6.41E-14
Phkg1	0.201999854	0.378	0.197	6.00E-12
Rps3	-0.201263915	0.601	0.598	0.000615297
Calm2	-0.202426224	0.391	0.406	0.013056298
Ptma	-0.206740846	0.808	0.835	1.50E-06
Rpl35a	-0.207078626	0.694	0.729	1.15E-07
mt-Nd1	-0.207905457	1	1	2.84E-19
Celf4	-0.208858436	0.135	0.242	5.53E-07
Ptp4a2	-0.210508002	0.191	0.253	0.000685207
Rpl23	-0.210601702	0.726	0.736	4.27E-06
Tpt1	-0.210853649	0.78	0.836	1.29E-08
Slc38a1	-0.211723879	0.204	0.303	7.79E-06
Map2	-0.21275418	0.432	0.493	6.98E-05
Pfdn5	-0.212992343	0.355	0.432	4.16E-05
Peg3	-0.215921728	0.3	0.382	4.17E-05
Rpl26	-0.216115395	0.612	0.64	2.80E-05
Rps12	-0.216688889	0.651	0.665	2.21E-05
Eid1	-0.217672124	0.218	0.285	0.0003526
Fau	-0.220118012	0.748	0.757	1.27E-05
Pam	-0.220780062	0.132	0.231	8.02E-07
Slc38a2	-0.224169012	0.062	0.168	1.23E-09
Hba-a1	-0.22479178	0.283	0.385	2.30E-06
App	-0.23325282	0.376	0.454	2.25E-05
Rpl21	-0.235068443	0.749	0.761	3.76E-07
Rpl17	-0.235745715	0.464	0.527	8.53E-06
Camk2n1	-0.23890276	0.464	0.513	0.00013908
Ttc3	-0.243069011	0.298	0.424	4.70E-08
mt-Nd4	-0.247793766	1	1	9.55E-33
Rtn1	-0.2541889	0.347	0.432	4.26E-06
Purb	-0.254918279	0.267	0.342	4.59E-05
mt-Co3	-0.255840866	1	1	1.82E-42
Rps24	-0.258515515	0.765	0.847	5.80E-11
Fth1	-0.259521318	0.998	1	2.29E-22
Set	-0.261454662	0.233	0.326	2.98E-06
Rplp1	-0.262384607	0.884	0.924	6.96E-13
mt-Nd2	-0.270202155	1	1	5.64E-31
Vim	-0.273170548	0.135	0.275	1.44E-10
Eef1a1	-0.279329354	0.821	0.866	2.13E-11
Rpl13	-0.279397392	0.78	0.814	3.80E-11
Atp1b1	-0.282670198	0.176	0.326	1.56E-11
Mal	-0.28279931	0.189	0.27	2.85E-05
Rpl37	-0.284779645	0.814	0.869	3.94E-10
Scg2	-0.284794612	0.189	0.304	5.67E-08
Pfdn2	-0.291385022	0.23	0.34	9.29E-08
mt-Atp8	-0.297783651	0.225	0.387	8.95E-13
Snhg11	-0.298372943	0.098	0.251	3.90E-14
Kif5a	-0.303815077	0.189	0.324	6.31E-10
Mbp	-0.30600031	0.818	0.899	4.33E-13
Kif5b	-0.311460486	0.458	0.546	1.21E-08
Rpsa	-0.312252169	0.673	0.708	9.24E-10
Hbb-bs	-0.327358051	0.467	0.566	9.34E-10
Basp1	-0.328623669	0.401	0.49	9.21E-08
mt-Co1	-0.34221655	1	1	1.62E-54
mt-Nd6	-0.351619663	0.181	0.349	1.22E-13
Ptgds	-0.351744658	0.694	0.791	1.54E-14
Calm1	-0.368665013	0.756	0.86	3.79E-20
Rps8	-0.376510101	0.847	0.913	1.10E-21
mt-Atp6	-0.381568891	1	1	2.32E-74
Map1b	-0.397711267	0.135	0.348	1.17E-19
Meg3	-0.401805745	0.283	0.46	2.78E-14
Hsp90ab1	-0.440961027	0.795	0.885	5.38E-26
mt-Co2	-0.483555291	1	1	1.15E-92
mt-Nd4l	-0.489533587	0.855	0.964	3.27E-41
6330403K07Rik	-0.511995881	0.577	0.739	3.05E-23
Hsp90aa1	-0.513244586	0.562	0.738	3.10E-25
Plp1	-0.57294312	0.552	0.743	2.01E-27
mt-Nd5	-0.574468608	0.787	0.944	3.70E-48
mt-Nd3	-0.581777732	0.98	1	5.94E-69
